# Supplementary material
Source: Springer Nature journal article supplement (https://www.springermedizin.de/resource/supplementary/13256_2010_1483_MOESM3_ESM.pdf/9647770)

# SERUM CREATININE TREND DURING COURSE OF ADMISSION

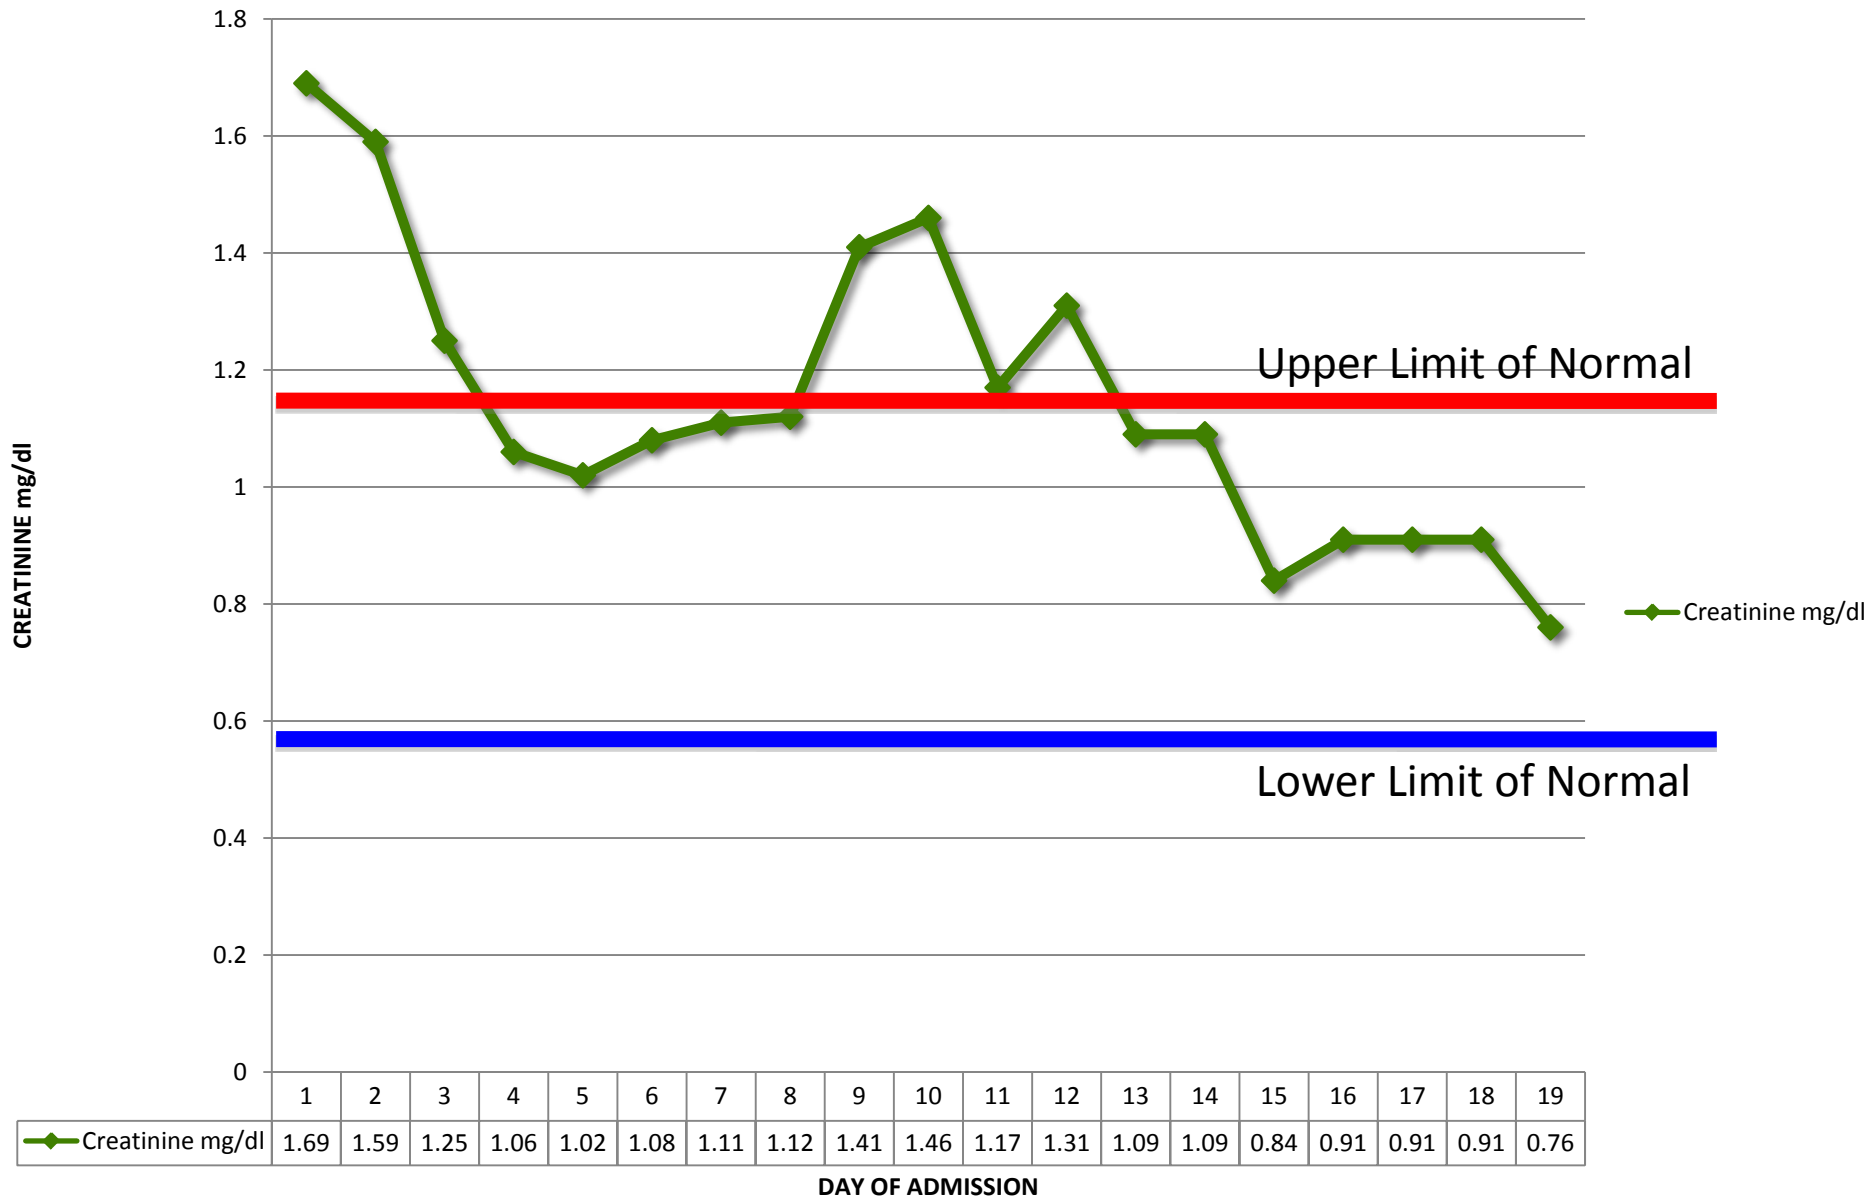

Supplement: MOESM3 [file 9647770]
